# Supplementary material for: Effect of Nanocolloids as an Ablation Medium on Structure and Morphology of Laser-generated Bimetallic Cu-Ni Nanoparticles
Source: Research Square preprint supplement (doi:10.21203/rs.3.rs-7977165/v1), 2025-11-14
Supplement: Supplementary file 1 [file 43decaf78df06871bb26760d.pdf]

# Supplementary Information

## Effect of Nanocolloids as an Ablation Medium on Structure and Morphology of Laser-generated Bimetallic Cu-Ni Nanoparticles

Monolina Chowdhury<sup>1</sup>, Bibek Kumar Singh<sup>2</sup>, Sudarshan Vadrnala<sup>3</sup>,  
Priyanka Dewangan<sup>4</sup>, Prem Pal<sup>4</sup>, Ajay Tripathi<sup>2</sup>, Rajesh Rawat<sup>1\*</sup>

<sup>1</sup>Laser-Matter Interaction Research Laboratory, Department of Physics, School of Basic Sciences, SRM University Sikkim, Tadong, Gangtok, 737102, Sikkim, India.

<sup>2</sup>Department of Physics, School of Physical Sciences, Sikkim University, 6th mile Samdur, Gangtok, 737102, Sikkim, India.

<sup>3</sup>Department of Physics, School of Advanced Sciences, VIT - AP University, Inavolu, Amaravati, 522237, Andhra Pradesh, India.

<sup>4</sup>MEMS & Micro/Nano Systems Laboratory, Department of Physics, Indian Institute of Technology, Sangareddy, Hyderabad 502284, Telangana, India.

\*Corresponding author(s). E-mail(s): [rajjuu.19@gmail.com](mailto:rajjuu.19@gmail.com);

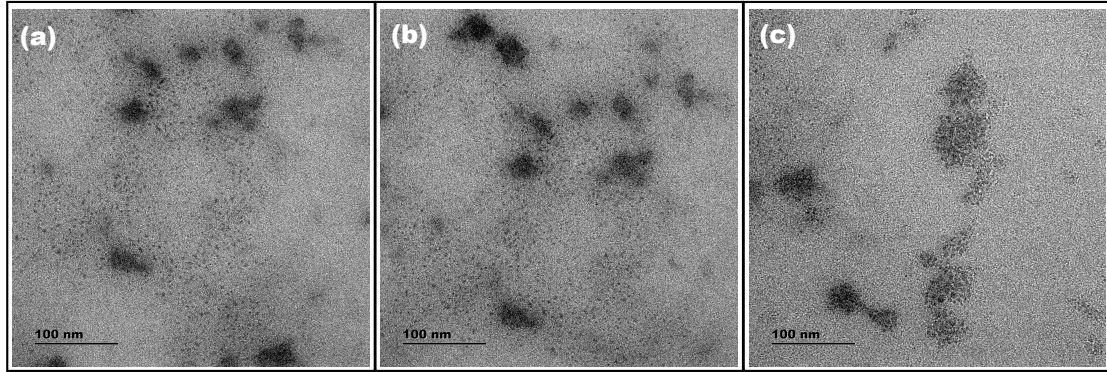

**Fig. S1** (a-c) TEM image used for size distribution analysis of M1 sample.

**Table S1** Physical and thermodynamic properties of the constituent elements governing the alloying of the NPs in the sample [1–3]

| Elements | Atomic Radius (Å) | Surface Free Energy (J/m <sup>2</sup> ) | Melting Temperature (K) | Thermal Conductivity (W/m K) | Crystal Structure | Lattice Parameter (Å) |
|----------|-------------------|-----------------------------------------|-------------------------|------------------------------|-------------------|-----------------------|
| Cu       | 1.28              | 1.48                                    | 1358                    | 397                          | FCC               | 3.61                  |
| Ni       | 1.24              | 2.34                                    | 1728                    | 88                           | FCC               | 3.52                  |

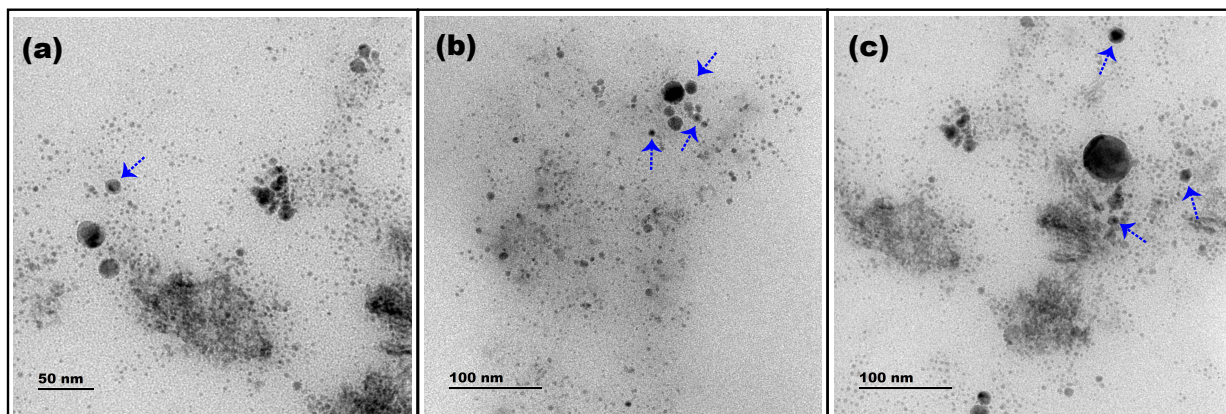

**Fig. S2** (a-c) TEM image used for size distribution analysis of M2 sample. The blue dotted arrows in the figures show the formation of CS structures in M2 sample.

## References

- [1] Ahmed J, Ramanujachary KV, Lofland SE, Furiato A, Gupta G, Shivaprasad S, et al. Bimetallic Cu-Ni nanoparticles of varying composition (CuNi<sub>3</sub>, CuNi, Cu<sub>3</sub>Ni). *Colloids and Surfaces A: Physicochemical and Engineering Aspects*. 2008;331(3):206–212.
- [2] Beaumont SK, Alayoglu S, Pushkarev VV, Liu Z, Kruse N, Somorjai GA. Exploring surface science and restructuring in reactive atmospheres of colloidally prepared bimetallic CuNi and CuCo nanoparticles on SiO<sub>2</sub> in situ using ambient pressure X-ray photoelectron spectroscopy. *Faraday Discussions*. 2013;162:31–44.
- [3] Rawat R, Blanchard NP, Shadangi Y, Tripathi A, Amans D. Laser Generation of AlCrCuFeNi High-Entropy Alloy Nanocolloids. *The Journal of Physical Chemistry C*. 2024;128(46):19815–19828.
